# Supplementary material for: Impaired renal reserve contributes to preeclampsia via the kynurenine and soluble fms–like tyrosine kinase 1 pathway
Source: PubMed Central journal article supplement (PMC9566901; doi:10.1172/jci158346), 2022-10-17

## Supplemental Material

### **Impaired renal reserve contributes to preeclampsia via the kynurenine and soluble fms-like tyrosine kinase 1 pathway**

*Vincent Dupont<sup>1,2</sup>, Anders H. Berg<sup>3</sup>, Michifumi Yamashita<sup>3</sup>, Chengqun Huang<sup>3</sup>, Ambart E. Covarrubias<sup>1</sup>, Shafat Ali<sup>1</sup>, Aleksandr Stotland<sup>4</sup>, Jennifer E. Van Eyk<sup>4</sup>, Belinda Jim<sup>5</sup>, Ravi Thadhani<sup>6</sup>, and S. Ananth Karumanchi<sup>1</sup>*

<sup>1</sup>Department of Medicine, Cedars-Sinai Medical Center, Los Angeles, CA

<sup>2</sup>EA-3801, Université de Reims Champagne-Ardenne, Reims, France

<sup>3</sup>Department of Pathology and Laboratory Medicine, Cedars-Sinai Medical Center, Los Angeles, CA

<sup>4</sup>Department of Biomedical Sciences and Smit Heart Institute, Cedars-Sinai Medical Center, Los Angeles, CA

<sup>5</sup>Department of Medicine, Jacobi Medical Center, Albert Einstein College of Medicine, Bronx, NY

<sup>6</sup>Department of Medicine, Massachusetts General Hospital, Harvard Medical School, Boston, MA

## SUPPLEMENTAL METHODS

### ***Glomerular Filtration Rate (GFR) measurements:***

To validate estimated GFR equations in mice, we directly measured GFR, plasma creatinine and cystatin C levels in an independent cohort of mice with varying degrees of renal insufficiency (N=17). Of these 17 mice, 6 animals had ischemia-reperfusion injury (1), 4 animals had uninephrectomy, 2 animals had CKD from oxalate nephropathy (2), 1 animal had CKD from genetic ablation of podocytes (3) and 4 with no kidney disease. Plasma creatinine (Diazyme) and cystatin C (Quantikine ELISA Mouse/Rat Cystatin C Immunoassay, R&D Systems) were measured according to manufacturer's instructions. GFR was measured using a FITC-sinistrin transdermal device (MediBeacon) as described elsewhere (4). Briefly, skin fluorescence was continuously recorded by the device during 1 hour following the retro-orbital injection of 5mg/100g body weight of FITC-sinistrin. Data were extracted and analyzed using MBstudio and MBlab softwares (MediBeacon) to calculate GFR. We then tested different models (linear, polynomial, logarithmic, exponential, power) to assess the best correlation of GFR with plasma creatinine and cystatin C concentrations based on r squared values. The best correlation was found using cystatin C measurements with the linear model (Supplemental Figure 1 C-D). In all subsequent experiments, we evaluated renal function by measuring cystatin C levels by ELISA and calculating estimated GFR (eGFR) values using the following formula:  $GFR \text{ (mL/min/100g body weight)} = -3.2886 * \text{plasma cystatin C } (\mu\text{g/mL}) + 2.9409$ .

### ***Quantification of L-kynurenine pathway metabolites***

Measurements of L-kynurenine and metabolites of L-kynurenine were performed using high performance liquid chromatography and isotope-dilutional mass spectrometry. All non-isotopic chemicals, except when noted, were purchased from Sigma-Aldrich, Saint Louis, MO; all isotopic standards, except when noted, were purchased from Toronto Research Chemicals, Toronto, Canada. Briefly, 10 microliters of plasma were mixed with 10 microliters of a 50 micromole/L mixture of isotopic standards diluted in water (L-kynurenine-d<sub>4</sub>, Quinolinic acid-<sup>13</sup>C<sub>3</sub>,<sup>15</sup>N<sub>1</sub>, Nicotinic acid riboside-d<sub>4</sub>, NAD<sup>+</sup>-d<sub>5</sub>, L-tryptophan-d<sub>5</sub> (CDN Isotopes, Pointe-Claire, Canada), nicotinamide-<sup>13</sup>C<sub>6</sub> (Sigma Aldrich, St. Louis, MO)). Plasma proteins were then precipitated by mixing with 80 µL acetonitrile (80% final conc.), and precipitates were cleared by centrifuging at 14,000 rpm for 10 minutes. Supernatant was transferred into a 96-well plate for analysis. Analysis was performed using an API 5500 triple quadrupole mass spectrometer from AB Sciex (Foster City, CA) coupled to a Shimadzu Prominence UFLC liquid chromatography system with autosampler (Shimadzu Scientific Instruments, Columbia, MD). High performance reverse phase chromatography was performed by injecting 15 microliters of plasma supernatant onto a Kinetex Polar C18 UPLC column (150 x 4.6 mm, 2.6 µm bead diameter, 100A pore size, Phenomenex, Inc., Torrance, CA) using a gradient elution protocol detailed in Supplemental Table S2. MS/MS transitions and settings for multiple reaction monitoring (MRM) of each metabolite is shown in Supplemental Table S3. Instrument control, data acquisition and quantification were performed using Analyst 1.6.2 software (Sciex, Framingham, MA). Calibration standards for each metabolite (L-tryptophan, L-kynurenine, quinolinic acid, kynurenic acid, nicotinamide, nicotinic acid,

NAD<sup>+</sup>, nicotinamide mononucleotide, and indoxyl sulfate) were diluted into phosphate buffered saline, standard curves for each metabolite were generated by running calibrator mixtures at 0, 12.5, 25, 50, and 100 micromoles/L for each metabolite. L-kynurenine-d4 was used as the internal standard for kynurenic acid and nicotinamide mononucleotide, quinolinic acid was used as internal standard for indoxyl sulfate. NAD<sup>+</sup>-d5 was internal standard for NAD<sup>+</sup> and NADH measurements. Metabolite concentrations were measured by quantifying the area under the curve (AUC) for each MRM transition and normalizing it to its respective isotopic standard and metabolite/internal standard ratio was converted into absolute concentrations according to each standard curve.

## SUPPLEMENTAL REFERENCES

1. Poyan Mehr A, Tran MT, Ralto KM, Leaf DE, Washco V, Messmer J, et al. De novo NAD(+) biosynthetic impairment in acute kidney injury in humans. *Nat Med*. 2018;24(9):1351-9.
2. Luz HL, Reichel M, Unwin RJ, Mutig K, Najenson AC, Tonner LM, et al. P2X7 Receptor Stimulation Is Not Required for Oxalate Crystal-Induced Kidney Injury. *Sci Rep*. 2019;9(1):20086.
3. Stotter BR, Talbot BE, Capen DE, Artelt N, Zeng J, Matsumoto Y, et al. Cosmc-dependent mucin-type O-linked glycosylation is essential for podocyte function. *Am J Physiol Renal Physiol*. 2020;318(2):F518-F30.
4. Scarfe L, Schock-Kusch D, Ressel L, Friedemann J, Shulhevich Y, Murray P, et al. Transdermal Measurement of Glomerular Filtration Rate in Mice. *J Vis Exp*. 2018(140).



## **SUPPLEMENTARY TABLES**

**Table S1: Raw data for Metabolomic profiling in non-pregnant state and during pregnancy in uninephrectomized mice and controls**

**Table S2. HPLC setting for Reverse Phase Chromatography**

**Table S3: MRM Mass Spectrometer Settings for isotope dilutional quantification of metabolites**







|                               |             |             |             |             |             |             |             |             |             |             |             |             |             |             |             |             |
|-------------------------------|-------------|-------------|-------------|-------------|-------------|-------------|-------------|-------------|-------------|-------------|-------------|-------------|-------------|-------------|-------------|-------------|
| Orotic acid                   | 10.6353778  | 28.2228823  | 26.0009066  | 11.4580975  | 65.6114936  | 12.8707679  | 20.3633996  | 29.6142525  | 35.5263333  | 0.7810596   | 11.8872492  | 13.8545222  | 13.9348746  | 15.5740418  | 11.8097276  | 21.8060423  |
| O-Succinyl-L-homoserine       | 0.72650466  | 9.29822502  | 0.33186934  | 1.51483231  | 1.78582053  | 1.25886354  | 0.07410025  | 0.87607454  | 2.5320654   | 6.39304035  | 2.33862174  | 0.96489116  | 4.6142085   | 1.79118841  | 1.17381181  | 0.18822279  |
| Oxamic acid                   | 0.263739281 | 0.019388248 | 0.102343217 | 0.021629235 | 0.127028632 | 0.070912255 | 0.014196147 | 0.048795168 | 0.35723472  | 0.12507275  | 3.795140181 | 0.045419741 | 0.18183078  | 0.076826558 | 0.045923984 | 0.007348051 |
| Phenylpyruvic acid            | 85.53338    | 37.67909    | 68.29974    | 74.12495    | 16.26408    | 31.69179    | 64.87049    | 33.28819    | 297.19949   | 61.83541    | 120.98398   | 43.5151     | 11.65828    | 26.68131    | 22.62059    | 56.9879     |
| Phosphoenolpyruvic acid       | 1.6303856   | 1.2381117   | 0.2964832   | 2.370477    | 5.7914277   | 0.7591647   | 10.2619166  | 1.2319255   | 0.308313    | 0.6251913   | 0.5571945   | 0.9208046   | 3.3803241   | 10.9433398  | 0.3716569   | 1.6592452   |
| Prephenic acid                | 0.68927645  | 0.31479773  | 0.447855    | 0.90008314  | 0.20831101  | 0.7070545   | 1.02358855  | 0.504322    | 1.33883388  | 0.75553035  | 0.41190262  | 0.30987006  | 0.08056539  | 0.60823444  | 0.17655564  | 0.02901105  |
| Pyridoxal 5 phosphate         | 0.075336759 | 0.017127015 | 0.01110873  | 0.014943375 | 0.050115883 | 0.022589205 | 0.046626203 | 0.055704192 | 0.021255068 | 0.018719933 | 0.089694486 | 0.035136016 | 0.006347538 | 0.029838638 | 0.013700744 | 0.026967082 |
| Pyridoxal hydrochloride       | 42.971801   | 22.932938   | 33.784443   | 47.40208    | 17.408739   | 14.244428   | 24.452615   | 41.440032   | 33.862064   | 20.42786    | 31.767489   | 20.983786   | 8.180867    | 8.159778    | 7.673163    | 12.723306   |
| Pyridoxamine                  | 0.11679365  | 0.04288198  | 0.01456488  | 0.0218282   | 0.03771099  | 0.04293612  | 0.1148956   | 0.02387835  | 0.14657243  | 0.08577451  | 0.04930666  | 0.01536083  | 0.01852693  | 0.06617169  | 0.02127728  | 0.01064408  |
| Pyridoxine                    | 0.044493597 | 0.007196009 | 0.006295666 | 0.023729212 | 0.070349787 | 0.019431254 | 0.042401331 | 0.036549522 | 0.056198589 | 0.025989017 | 0.004748002 | 0.023223903 | 0.033031548 | 0.006200268 | 0.027843976 | 0.018959462 |
| Pyruvic acid                  | 35.02923    | 27.875      | 19.36074    | 18.29951    | 40.46649    | 23.4249     | 80.03653    | 41.41164    | 36.17542    | 10.89089    | 34.39794    | 15.39854    | 14.66961    | 22.15831    | 26.99408    | 62.41118    |
| Quinic acid                   | 0.13778051  | 0.18000788  | 37.16565924 | 0.38161654  | 0.97052181  | 0.41578876  | 0.54156989  | 28.33782229 | 0.32763342  | 0.1548903   | 0.06937234  | 1.49746128  | 0.24567657  | 0.10987652  | 2.19237885  | 0.49173379  |
| Riboflavin                    | 4.515492    | 2.785324    | 3.313833    | 4.71573     | 12.306436   | 6.155485    | 11.413775   | 9.051999    | 6.661967    | 4.589127    | 5.671828    | 2.663282    | 4.73074     | 5.082106    | 4.419727    | 9.686734    |
| Ribonic acid gamma lactone    | 0.20691163  | 0.23131798  | 0.2348918   | 0.13086506  | 0.15514418  | 0.30344788  | 0.42818377  | 1.43016818  | 0.13928131  | 1           | 0.12720405  | 0.2009589   | 0.03274399  | 0.41875554  | 0.07986553  | 0.1099699   |
| S-2-Aminoethyl-L-cysteine     | 0.002901588 | 0.00923276  | 0.022540821 | 0.003613196 | 0.00577006  | 0.027189538 | 0.010029739 | 0.073024269 | 0.005042682 | 0.067568963 | 0.006095564 | 0.002396469 | 0.001504584 | 0.019494938 | 0.003383335 | 0.0021842   |
| S-5-Adenosyl-L-homocysteine   | 0.19894066  | 2.0686985   | 0.02615313  | 0.07931886  | 0.54488491  | 0.05262932  | 0.06323973  | 0.69695247  | 0.05439666  | 0.21629759  | 0.20392384  | 0.04033733  | 0.0729446   | 0.2750385   | 0.01637844  | 0.04953528  |
| Salicylic acid                | 329.8524    | 310.4768    | 483.8678    | 766.9512    | 833.9231    | 466.9752    | 1069.2726   | 1029.118    | 1287.4672   | 227.151     | 415.0164    | 281.2373    | 597.7789    | 961.1854    | 621.6994    | 927.7229    |
| Shikimic acid                 | 0.03113439  | 0.08934497  | 0.21284233  | 0.07301461  | 0.04906816  | 0.01708142  | 0.02615886  | 0.08620594  | 0.07827334  | 0.02780046  | 0.06830827  | 0.077785    | 0.01240901  | 0.06609093  | 0.02850468  | 0.06150173  |
| Succinic acid                 | 1179.095    | 1238.372    | 1379.813    | 1512.976    | 3196.488    | 2037.588    | 4982.965    | 2879.364    | 6130.856    | 2281.244    | 3492.275    | 1565.839    | 1876.563    | 1815.952    | 2101.673    | 6417.874    |
| Succinic semialdehyde         | 0.3438837   | 0.30598756  | 0.27655161  | 0.18199817  | 0.14300014  | 0.70279983  | 0.17117968  | 0.53032019  | 0.59531827  | 0.73101034  | 0.04037461  | 0.34842622  | 0.01776637  | 0.13568803  | 0.04517473  | 0.0960843   |
| Taurine                       | 194.43822   | 84.90006    | 183.90929   | 199.56113   | 326.55769   | 190.33069   | 248.28945   | 361.59651   | 204.97762   | 287.77536   | 195.7684    | 93.20726    | 256.43602   | 217.48428   | 195.67688   | 377.40196   |
| Taurolcholic acid             | 20.01509    | 52.74035    | 77.07931    | 63.96632    | 44.03781    | 140.4937    | 192.39049   | 67.90539    | 204.77907   | 173.61252   | 249.18632   | 97.38499    | 156.94134   | 82.85692    | 261.79531   | 53.25747    |
| Thiamine                      | 1.12720448  | 0.09299369  | 0.08005223  | 0.08784045  | 1.16479442  | 0.28651631  | 0.88074909  | 0.34875937  | 0.34123027  | 0.11856902  | 0.28938846  | 0.13480289  | 0.12310614  | 0.3848235   | 0.31782153  | 0.22388268  |
| Thymidine 5-diphosphate       | 0.077730288 | 0.007209742 | 0.061177445 | 0.035654943 | 0.070996636 | 0.156383312 | 0.123939315 | 0.075204973 | 0.122574033 | 0.100632316 | 0.175013395 | 0.022047304 | 0.013167042 | 0.073332296 | 0.01335423  | 0.153045699 |
| Thymidine                     | 25.4837     | 38.93717    | 20.63798    | 25.54321    | 45.89581    | 53.25092    | 53.36397    | 25.12125    | 68.50346    | 24.58422    | 20.19781    | 17.7291     | 11.75378    | 15.38223    | 12.82308    | 22.64527    |
| Thymine                       | 0.33192706  | 0.69114871  | 0.65941921  | 0.09935941  | 4.07702254  | 3.64862268  | 4.53930121  | 3.18406507  | 2.95812046  | 1.99437058  | 1.99590302  | 1.16350323  | 1.44532693  | 2.12169763  | 1.00078347  | 0.97376395  |
| trans-4-Hydroxy-L-proline     | 0.06514946  | 0.07009803  | 0.09037278  | 0.04188319  | 0.23771131  | 0.25884133  | 0.34638653  | 0.22433999  | 0.07759717  | 0.0626705   | 0.04229308  | 0.0326186   | 0.07351541  | 0.03848751  | 0.13488306  | 0.1068863   |
| trans-Aconitic acid           | 523.1912    | 682.5211    | 1453.1724   | 1005.5091   | 2891.6146   | 776.654     | 2318.7474   | 755.0236    | 4266.8872   | 1597.0428   | 1201.7106   | 880.8064    | 1747.1306   | 856.9428    | 930.1368    | 1082.3195   |
| trans-trans Muconic acid      | 0.024343916 | 0.027215752 | 0.060941276 | 0.030727941 | 0.023928524 | 0.032240114 | 0.008382271 | 0.002059461 | 0.013340972 | 0.047688435 | 0.021664256 | 0.016039198 | 0.012392712 | 0.009409097 | 0.013335116 | 0.043476736 |
| Trehalose 6-phosphate         | 0.10926377  | 0.12882636  | 0.0532332   | 0.0881463   | 0.02758386  | 0.07279972  | 0.08814052  | 0.07584365  | 0.01923868  | 0.01938302  | 0.07759289  | 0.04245136  | 0.03412834  | 0.01730092  | 0.09963334  | 0.13674588  |
| Trehalose                     | 0.8553901   | 0.5101067   | 0.780271    | 0.635022    | 0.5168707   | 0.7146772   | 0.6576389   | 0.2199471   | 1.0660047   | 1.2227082   | 0.551616    | 0.4046044   | 0.1924801   | 0.192104    | 0.3114386   | 0.2722653   |
| Uracil                        | 33.063274   | 5.174642    | 24.49343    | 1.261119    | 81.806346   | 100.812019  | 250.408164  | 78.382217   | 55.722572   | 56.288331   | 36.14182    | 21.825906   | 33.832382   | 43.90002    | 59.739791   | 158.417795  |
| Uric acid                     | 6321.8697   | 4582.5309   | 6103.8525   | 877.2656    | 5423.8641   | 672.6707    | 3254.5835   | 1910.9265   | 139.2098    | 1087.6152   | 1032.8977   | 5035.8736   | 3109.9306   | 1805.2304   | 994.5981    | 2357.2436   |
| Uridine 5'-diphosphogalactose | 17.6581199  | 14.1906053  | 15.1433512  | 15.8676524  | 7.2073714   | 13.6960212  | 5.0097214   | 0.7709553   | 23.123437   | 6.085056    | 0.6316033   | 6.6292227   | 8.4997606   | 31.2383713  | 2.23123     | 5.0486764   |
| Uridine 5-diphosphate         | 0.05973995  | 0.073929444 | 0.01076934  | 0.184765898 | 0.02649034  | 0.053931604 | 0.013997341 | 0.011158899 | 0.059256201 | 0.05705908  | 0.013859659 | 0.007663177 | 0.021509888 | 0.042050608 | 0.00811383  | 0.00962856  |
| Uridine 5-diphosphoglucose    | 17.6581199  | 14.1906053  | 15.1433512  | 15.8676524  | 7.2073714   | 13.6960212  | 5.0097214   | 0.7709553   | 23.123437   | 6.085056    | 0.6316033   | 6.6292227   | 8.4997606   | 31.2383713  | 2.23123     | 5.0486764   |
| Uridine 5-monophosphate       | 5.71430312  | 0.7034941   | 0.97258615  | 2.3946915   | 1.01928498  | 0.80388592  | 0.02400367  | 0.58089886  | 0.7510917   | 0.22853267  | 0.65631528  | 2.45276198  | 1.65497609  | 3.89671466  | 1.21326686  | 0.19110169  |
| Uridine 5-triphosphate        | 0.049077733 | 0.019134367 | 0.051241206 | 0.050446256 | 0.016805628 | 0.014000282 | 0.036116294 | 0.03321787  | 0.021153138 | 0.021533729 | 0.034296311 | 0.016052333 | 0.003480788 | 0.015033264 | 0.015975416 | 0.04418328  |
| Uridine                       | 324.9264    | 69.36707    | 243.38638   | 155.19493   | 110.40218   | 295.16479   | 236.04111   | 105.18128   | 222.09031   | 84.45513    | 91.07905    | 179.25362   | 46.84741    | 98.85334    | 83.22474    | 216.60373   |
| Vanillic acid                 | 1.2727152   | 0.4931905   | 0.5794625   | 0.2502396   | 0.7629475   | 0.2198843   | 0.7832157   | 0.4071818   | 2.1388803   | 0.8314462   | 0.3888596   | 0.2185147   | 0.9793995   | 0.5842783   | 0.1573207   | 1.6390328   |
| Xanthine                      | 7.37E-01    | 6.98E-02    | 3.51E+02    | 2.34E-02    | 6.91E-03    | 1.10E-01    | 1.48E-01    | 5.10E-02    | 7.41E-02    | 1.95E-01    | 1.71E-02    | 6.59E+01    | 6.76E+02    | 4.32E-02    | 3.15E-02    | 2.70E-01    |
| Xanthosine                    | 249.04545   | 234.74997   | 270.50046   | 76.41716    | 508.85908   | 30.62075    | 91.51357    | 76.70194    | 153.38873   | 26.41666    | 32.13758    | 485.46687   | 715.72642   | 34.56154    | 33.80501    | 38.80797    |
| Xylitol                       | 1.0666891   | 0.656876    | 0.4677887   | 0.6477543   | 2.1958953   | 1.277244    | 0.9083101   | 0.4905191   | 2.0126279   | 1.3320049   | 1.4376948   | 0.9111761   | 1.5742927   | 0.7420066   | 0.7647662   | 1.139168    |

## Table S2: HPLC setting for Reverse Phase Chromatography

HPLC settings for reverse phase chromatographic separation of plasma metabolites by gradient elution, confirmatory quantification by isotope dilutional MS. Buffer A comprised of 20 mM ammonium formate and 0.05% formic acid in HPLC grade water; Buffer B comprised of acetonitrile with 0.05% formic acid, flow rate 0.6 ml/min.

| Time (min) | % Buffer B |
|------------|------------|
| 0 – 7.0    | 3% – 50%   |
| 7.0 – 7.4  | 50% - 100% |
| 7.5 – 7.9  | 100%       |
| 8.0 – 10.0 | 3%         |

**Table S3. MRM Mass Spectrometer Settings, confirmatory quantification by isotope dilutional MS**

| Positive ion mode                                                                                            |                |                  |                      |                      |
|--------------------------------------------------------------------------------------------------------------|----------------|------------------|----------------------|----------------------|
| Metabolite                                                                                                   | Parent ion m/z | Daughter ion m/z | Collision energy (V) | Retention Time (min) |
| Tryptophan                                                                                                   | 205.2          | 146              | 25                   | 4.98                 |
| Tryptophan-d5                                                                                                | 210            | 150              | 25                   | 4.94                 |
| Kynurenine                                                                                                   | 209.2          | 94               | 22                   | 4.42                 |
| Kynurenine-d4                                                                                                | 213.2          | 98               | 22                   | 4.39                 |
| kynurenic acid                                                                                               | 190.2          | 144              | 25                   | 5.18                 |
| Nicotinamide                                                                                                 | 123.1          | 80               | 25                   | 4.57                 |
| nicotinamide-13C6                                                                                            | 129.1          | 85               | 25                   | 4.59                 |
| nicotinamide mononucleotide                                                                                  | 335.2          | 123              | 20                   | 2.84                 |
| Nicotinamide riboside                                                                                        | 255.0          | 123.0            | 20                   | 3.16                 |
| Indole-3-acetic acid                                                                                         | 176.1          | 130.0            | 25                   | 7.28                 |
| Indole-3-propionic acid                                                                                      | 190.1          | 130.0            | 25                   | 8.18                 |
| NAD+                                                                                                         | 664.4          | 428.0            | 25                   | 3.94                 |
| NAD+-d5                                                                                                      | 669.4          | 428.0            | 25                   | 3.94                 |
| NADH                                                                                                         | 665.4          | 524              | 25                   | 3.30                 |
| Curtain gas: 25, GS1 0, GS2 0, Spray voltage 3000V, Source temperature 400°C.                                |                |                  |                      |                      |
| Declustering potential 75, Entrance potential 5, collision excitation potential 15, collision gas 6.         |                |                  |                      |                      |
| Negative ion mode                                                                                            |                |                  |                      |                      |
| Quinolinic acid                                                                                              | 166.1          | 78               | -25                  | 2.91                 |
| Quinolinic acid-13C3, 15N1                                                                                   | 170.1          | 82               | -25                  | 3.03                 |
| Indoxyl sulfate                                                                                              | 212.2          | 80               | -25                  | 5.54                 |
| Curtain gas: 25, GS1 0, GS2 0, Spray voltage -3000V, Source temperature 400°C.                               |                |                  |                      |                      |
| Declustering potential -75, Entrance potential -5, collision excitation potential -15, collision gas Medium. |                |                  |                      |                      |

## **Supplemental Figure 1. Phenotypes of Sham and Uninephrectomized mice during Pregnancy**

**(A)** Correlation of plasma cystatin C levels with directly measured GFR measured as described in Methods (n=17) in mouse models with varying degrees of renal insufficiency. Plasma cystatin C levels showed a strong negative correlation with GFR using both linear ( $R^2= 0.82$ ) and polynomial models ( $R^2= 0.82$ ). **(B)** Correlation of plasma creatinine levels with glomerular filtration rate (GFR) measured as described in Methods (N=17). Plasma creatinine level showed a modest relationship with measured GFR using both linear ( $R^2= 0.53$ ) or power models ( $R^2= 0.71$ ) **(C)** Plasma cystatin C measurements at baseline, Day 1, Day 7 and Day 14 after surgery in control (Sham) and uninephrectomized (UNx) mice. **(D)** Estimated glomerular filtration rate (eGFR) at baseline, Day 1, Day 7 and Day 14 after surgery was calculated in Sham and UNx mice as described in Methods. **(E)** Body weights of Sham and UNx mice throughout pregnancy. **(F)** Gestational day 18 (GD18) left kidney weights in Sham and UNx mice. Data were normalized with body weight values. Data depicted as mean  $\pm$  standard deviation. n=6 per group except otherwise indicated. Unpaired 2-tailed *t* test; \* $P < 0.05$  in UNx versus Sham mice.



**A.**

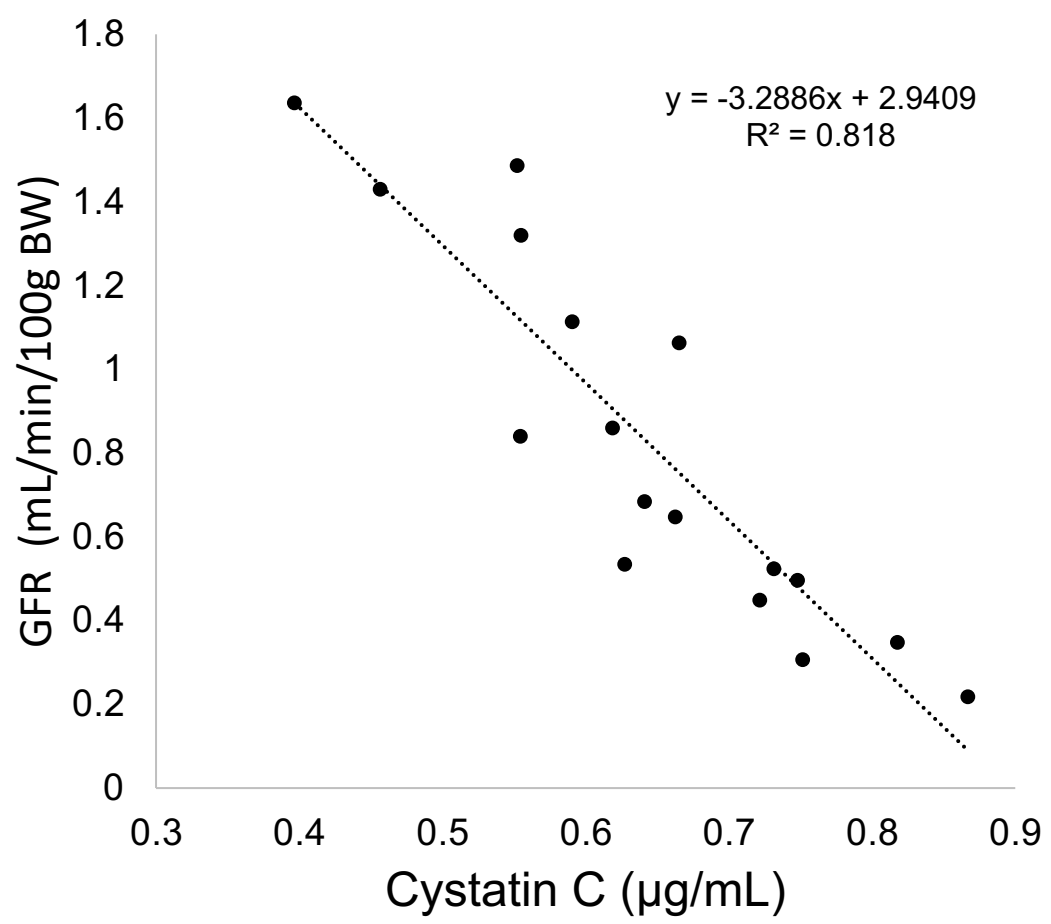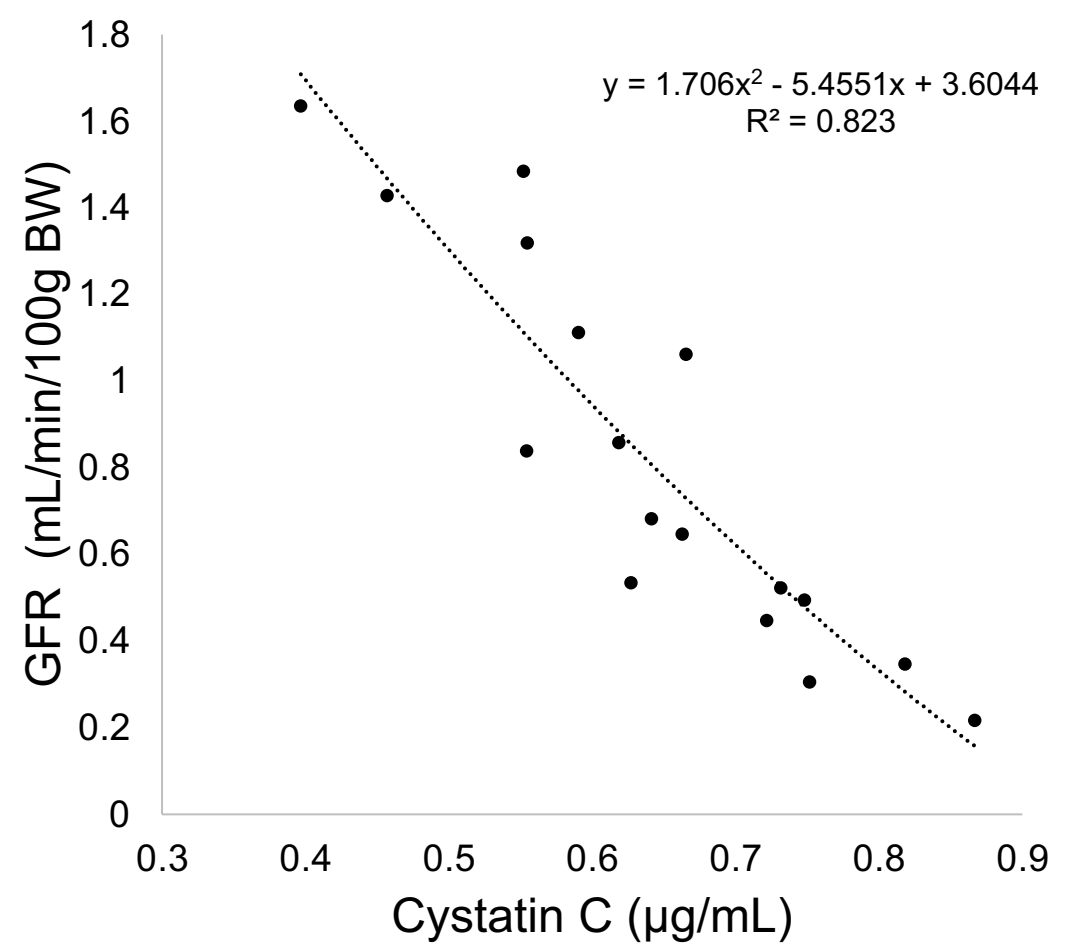

**B.**

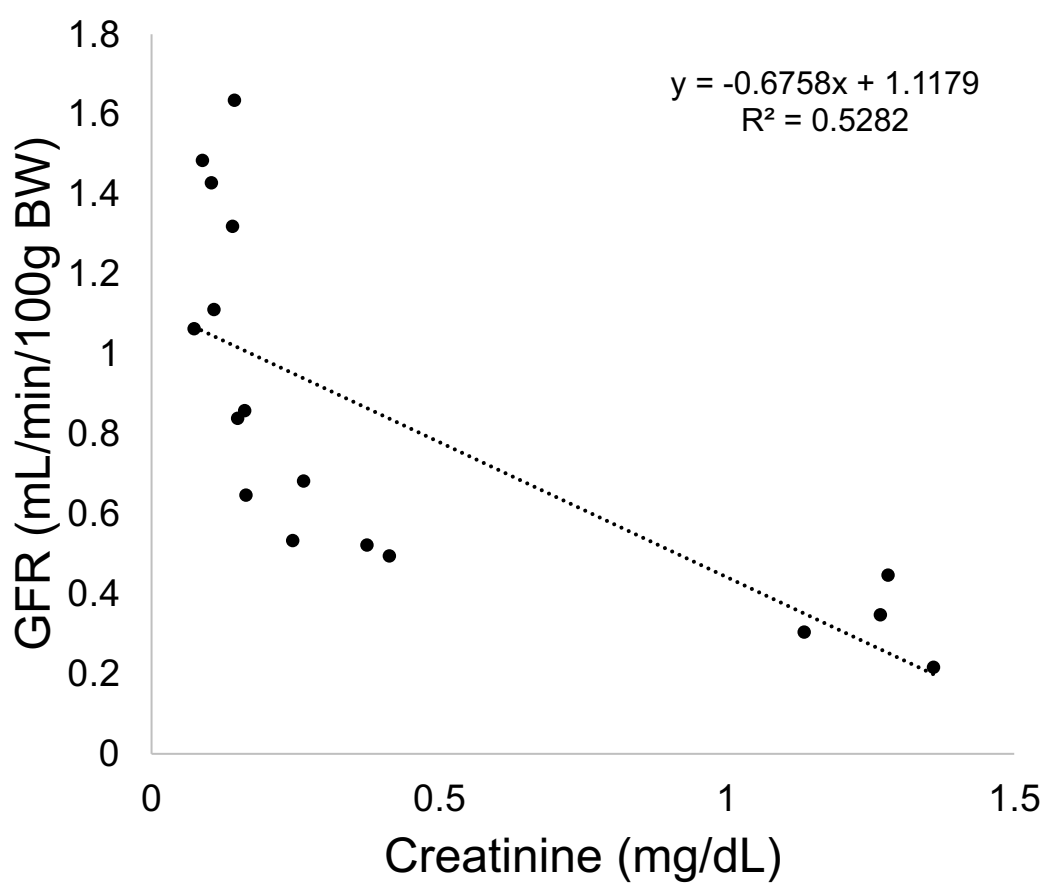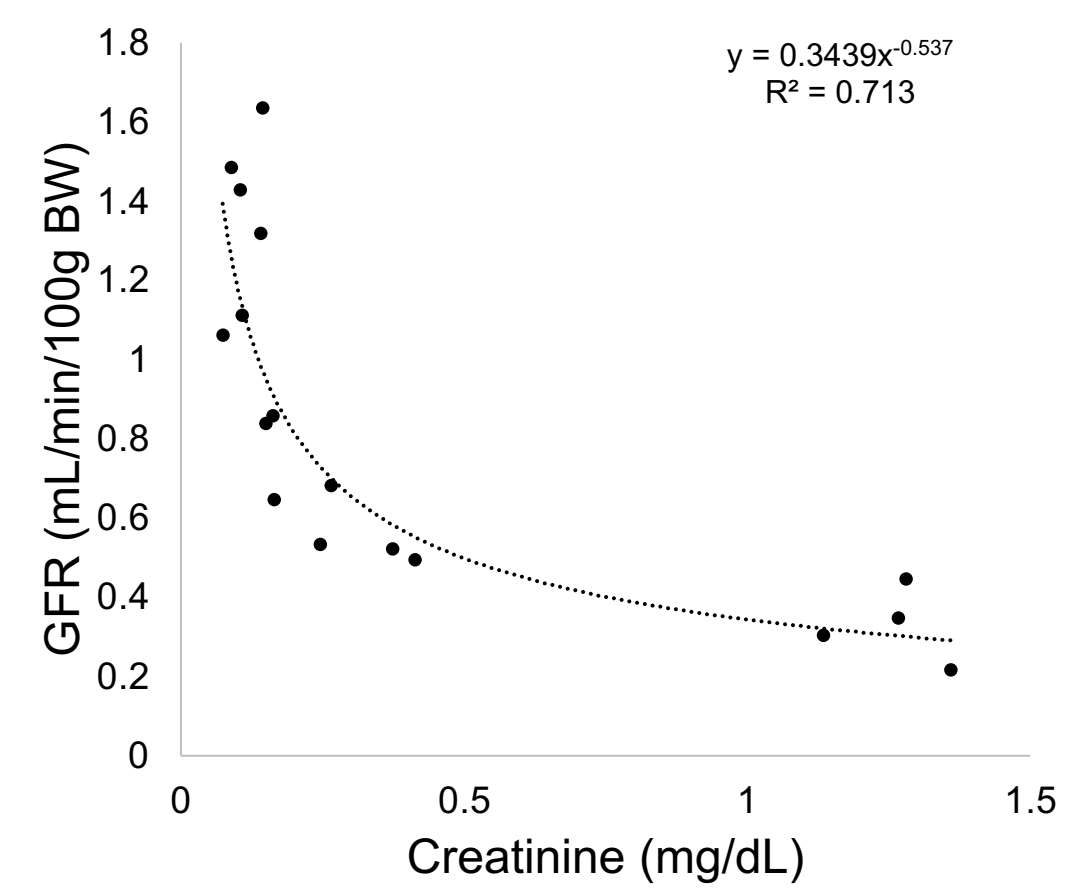

**C.**

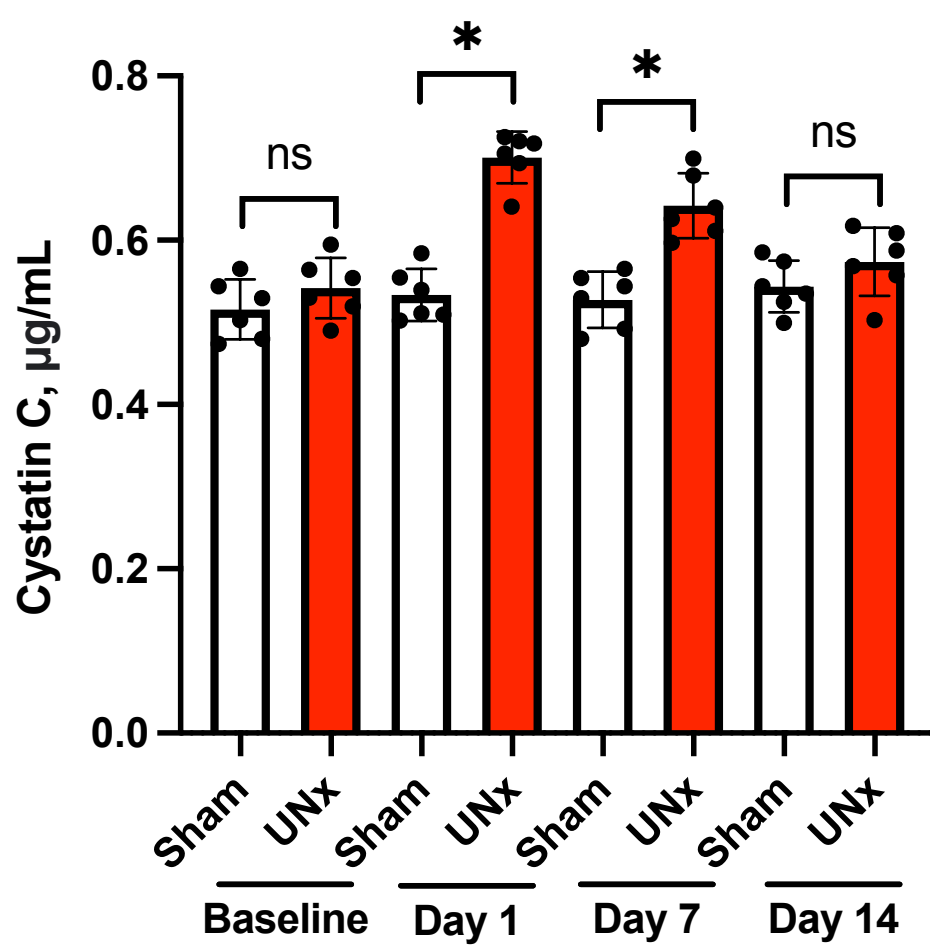

**D.**

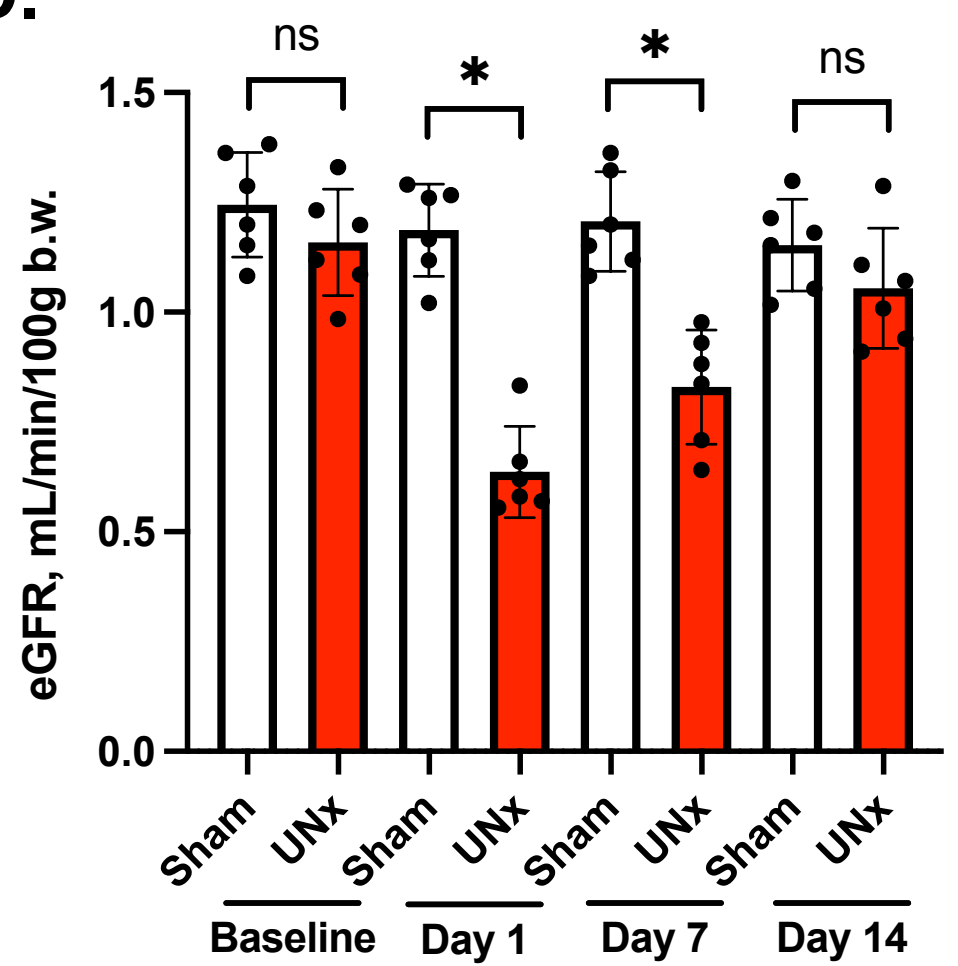

**E.**

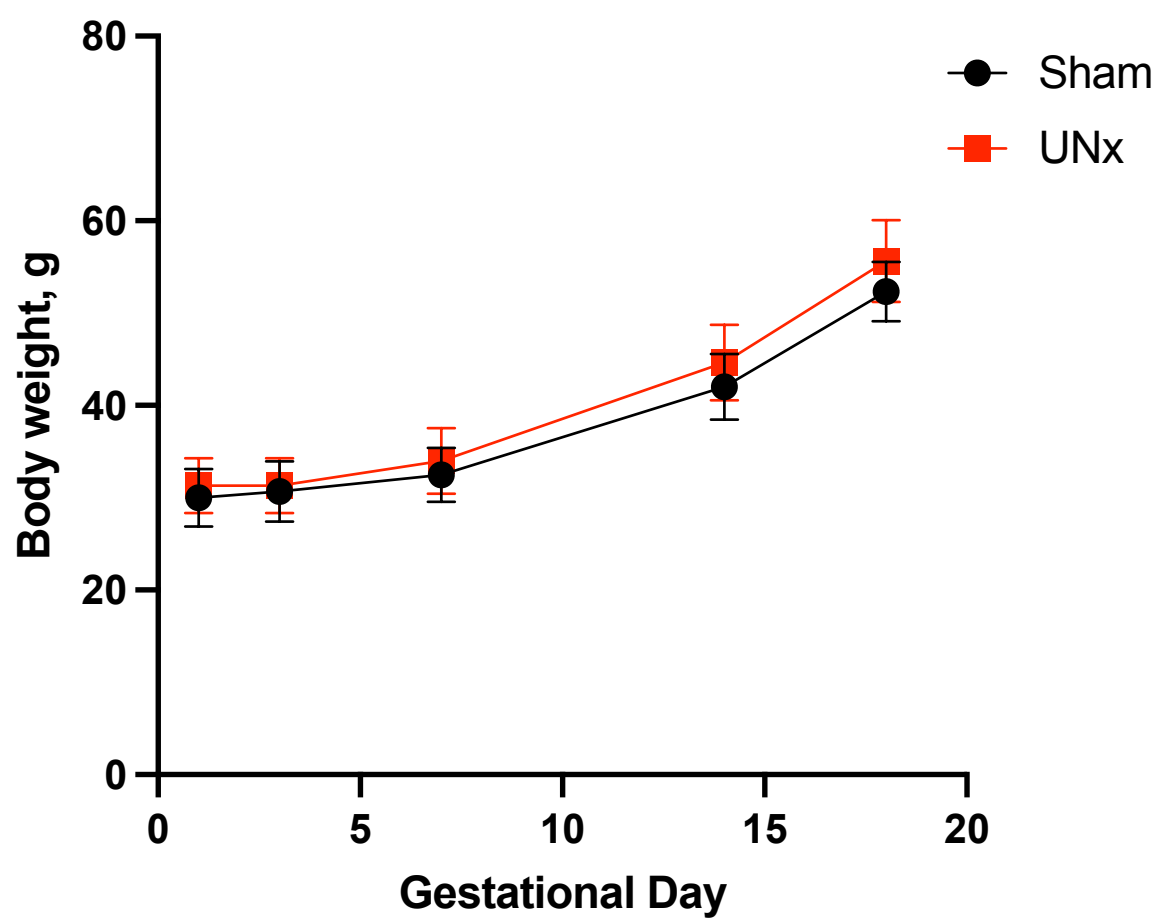

**F.**

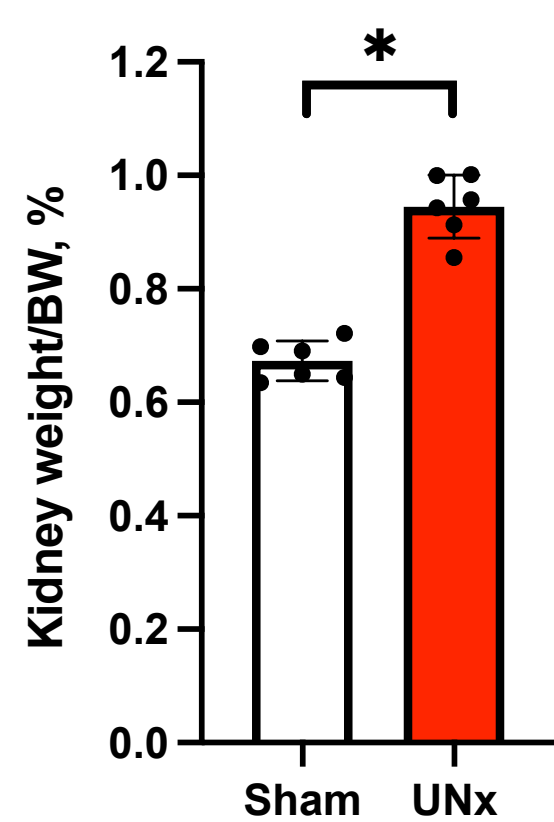

## **Supplemental Figure 2. Additional Features of the Impact of Prior Uninephrectomy on Pregnancy in mice**

**(A)** CD34 immunohistochemistry analysis of renal tissue at GD18 from one representative control (Sham, left panel) and one uninephrectomized (UNx, right panel) mice. UNx mice exhibit loss of CD34 positive endothelial cells among glomerular capillaries (scale bar=125 $\mu$ m). Summary data for the CD34 positive glomerular area quantified using ImageJ software in Sham and UNx mice at GD18 is depicted. GD18 plasma aspartate aminotransferase (AST) **(B)** and alanine aminotransferase **(C)** measurements in Sham and UNx mice. **(D)** Plasma volume measurements in Sham and UNx mice in non-pregnant (NP) state, at GD14 and GD18, and shown as change when compared with NP values **(E)**. Data were normalized with body weight values. Data depicted as mean  $\pm$  standard deviation. n=6 per group except otherwise indicated. Unpaired 2-tailed *t* test; \**P* < 0.05 in UNx versus Sham mice.

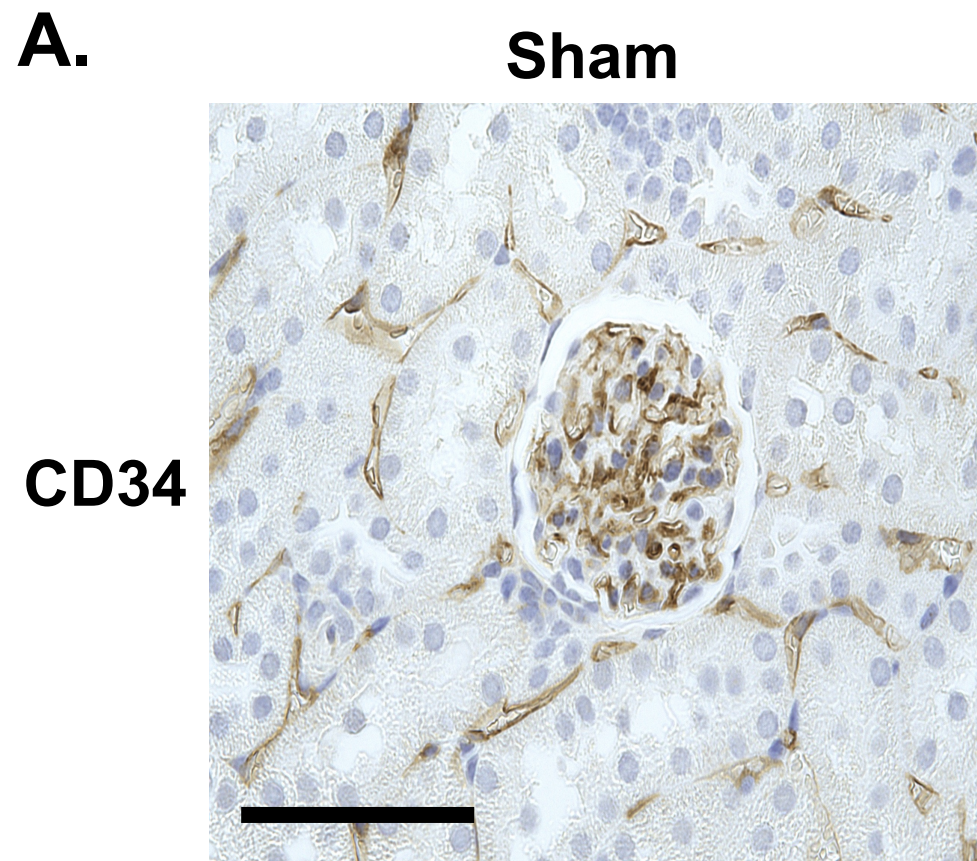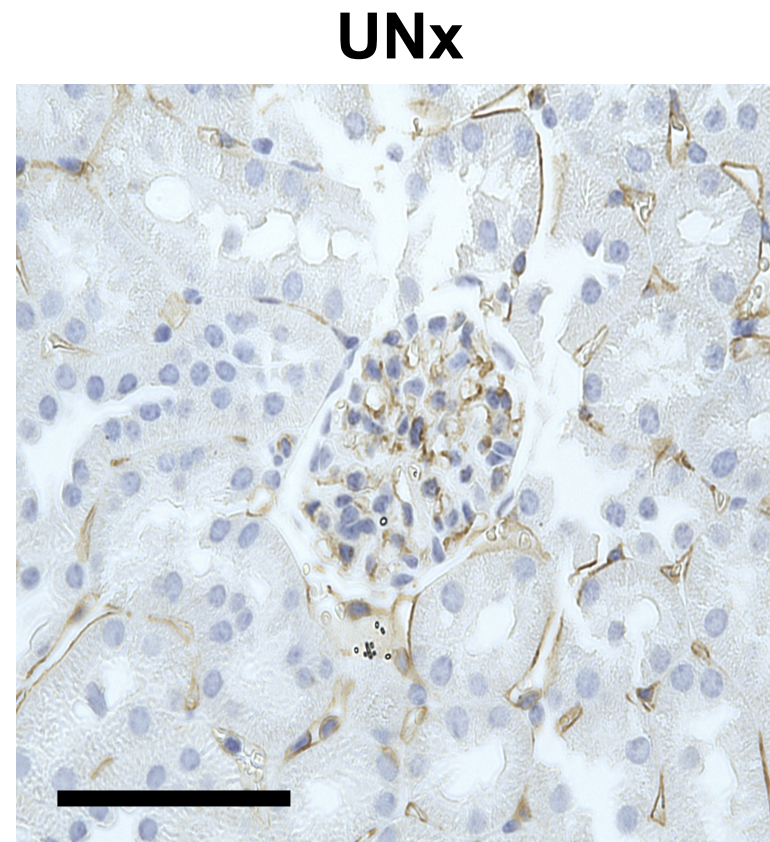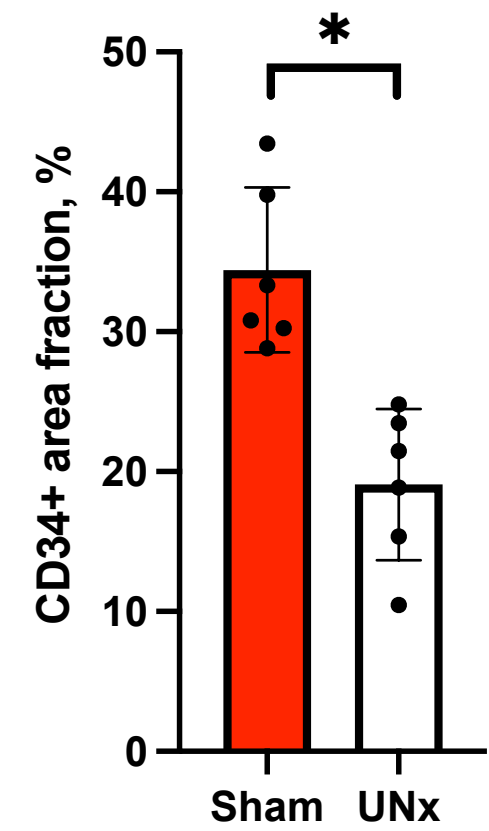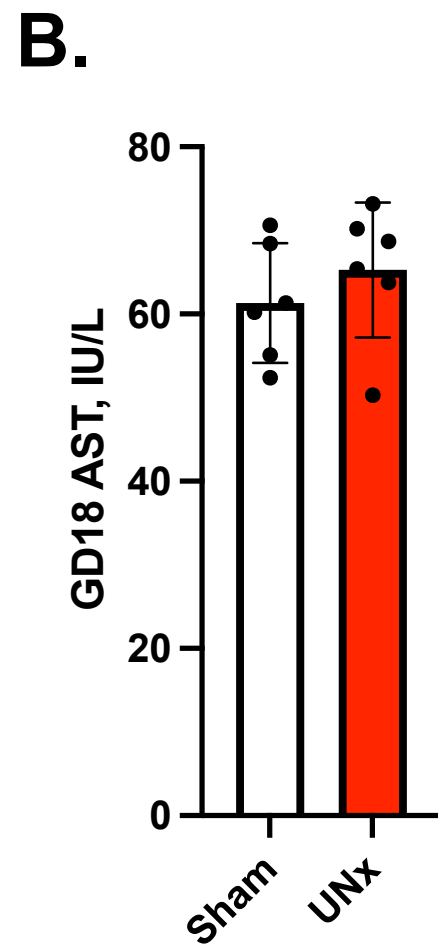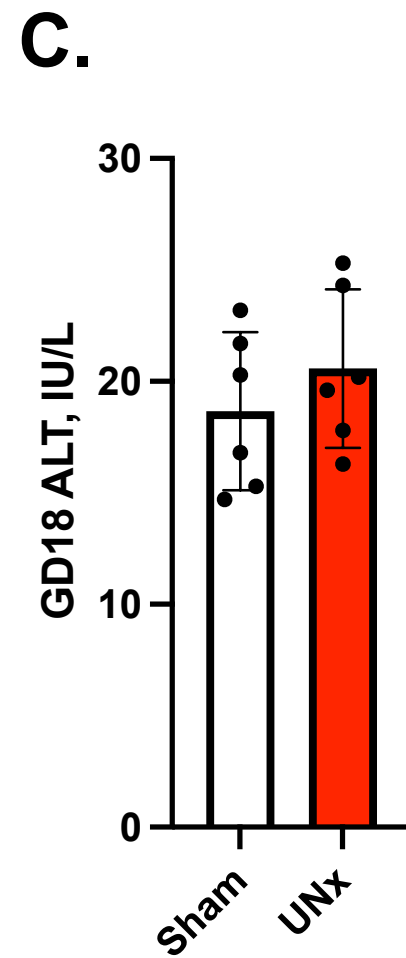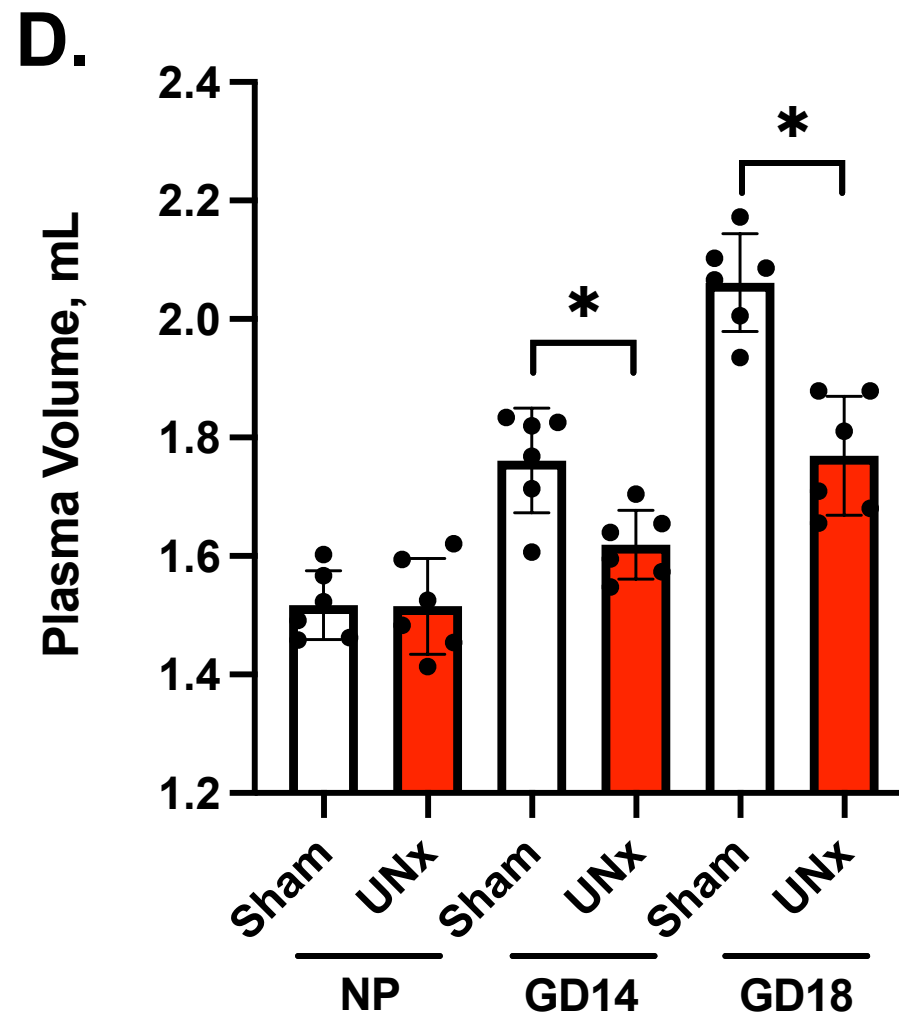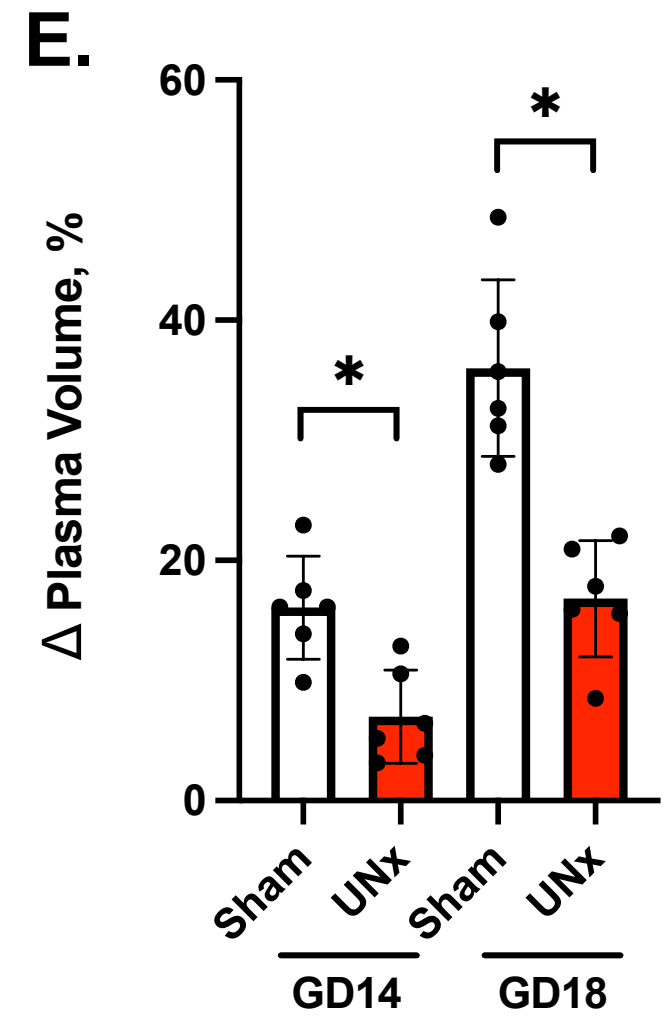

### **Supplemental Figure 3. Phenotypes of Uninephrectomized mice treated with PBS or Placental Growth Factor**

**(A)** Body weights of uninephrectomized (UNx) mice treated with either PBS or placental growth factor (PIGF) throughout pregnancy. **(B)** Gestational day 18 (GD18) left kidney weights in UNx mice treated with PBS or PIGF. Data were normalized with body weight values. **(C)** CD34 immunohistochemistry analysis of renal tissue at GD18 from one representative UNx mice treated with PBS (left panel) or PIGF (right panel). PIGF treatment increased CD34 positive area among glomeruli in late pregnant UNx mice (scale bar= 125 $\mu$ m). **(D)** Summary data for the CD34 positive glomerular area quantified using ImageJ software in UNx mice treated with PBS or PIGF at GD18 is depicted. **(E)** Histopathological analysis of placenta tissue from one representative UNx mice treated with PBS (upper panel) or PIGF (lower panel) at GD18 (scale bar= 125  $\mu$ m). H&E stain and CD34 stain shows similar labyrinthine vasculature in UNx mice treated with PBS or PIGF. **(F)** Summary data for the CD34 immunohistochemistry quantitated within the labyrinth (using ImageJ software) between UNx mice treated with PBS or PIGF. Data depicted as mean  $\pm$  standard deviation. n=6 per group. Unpaired 2-tailed *t* test; \**P* < 0.05 in in UNx mice treated with PIGF versus PBS.



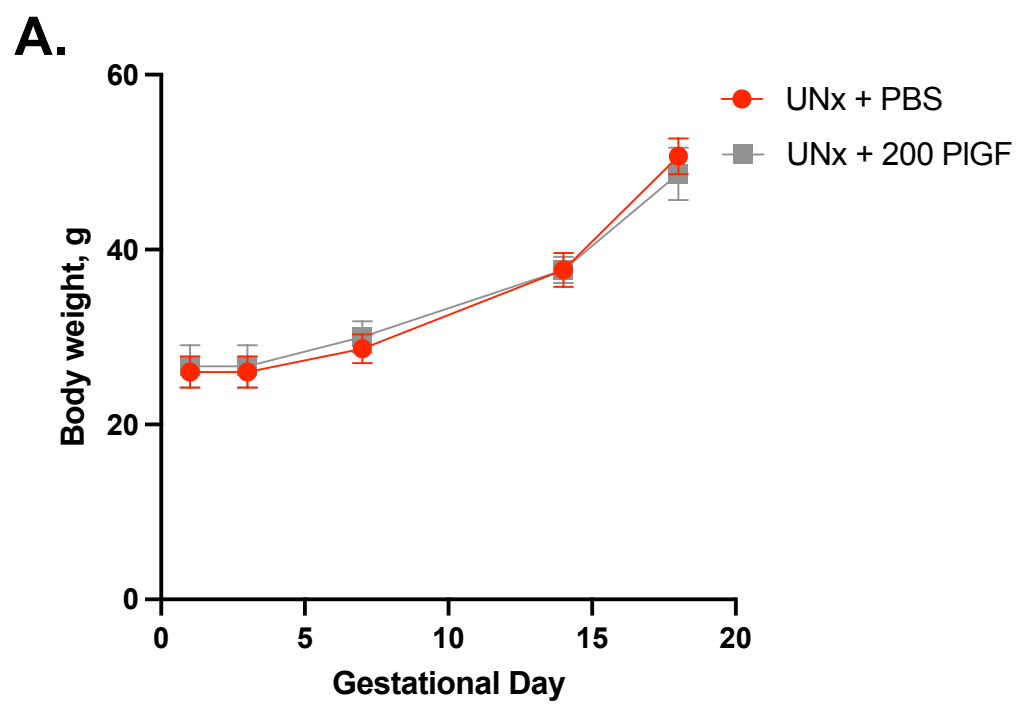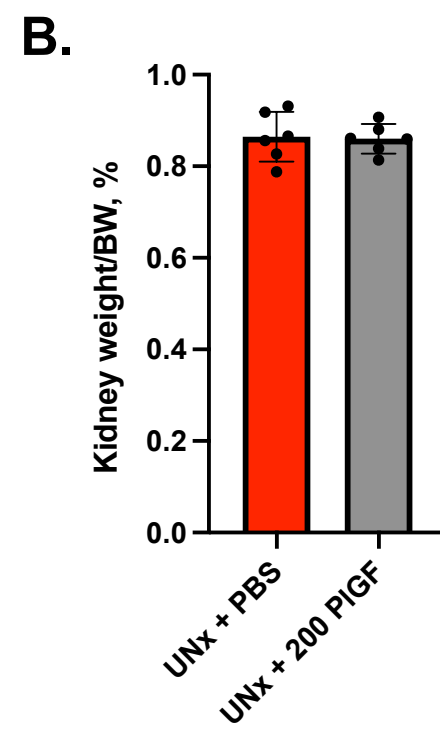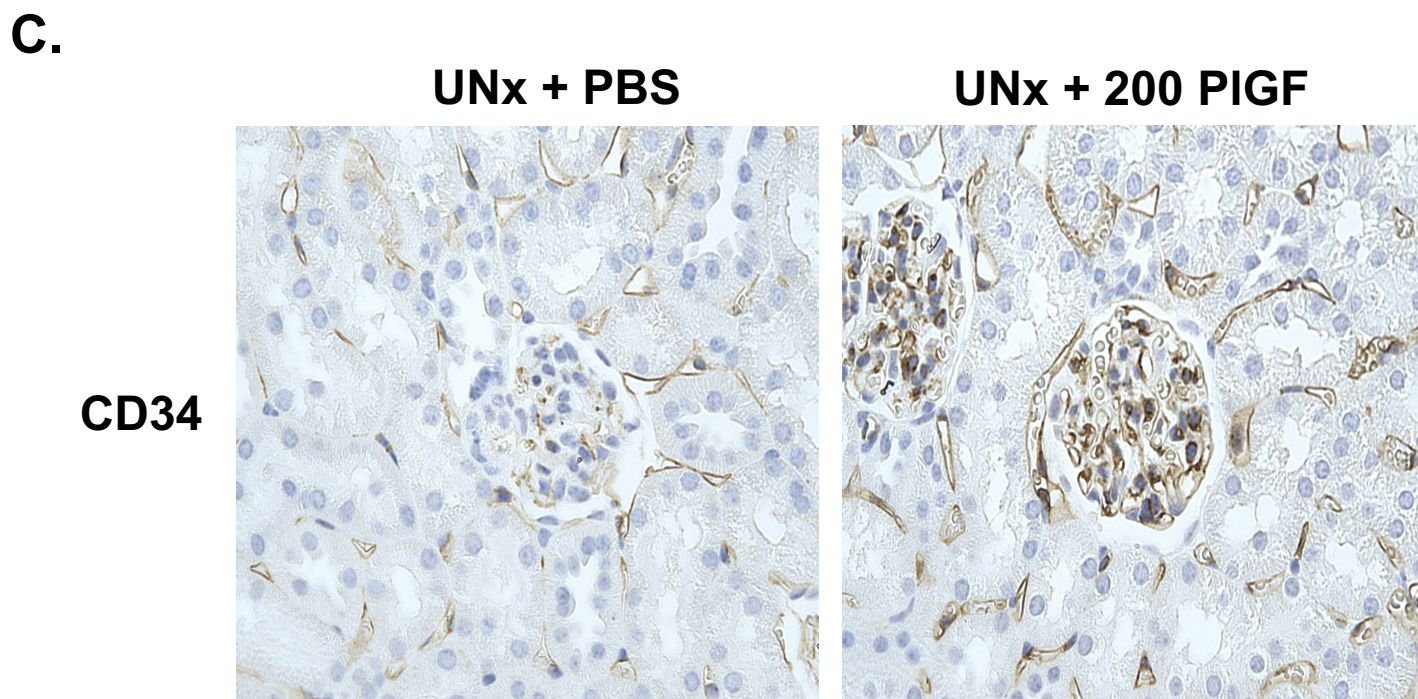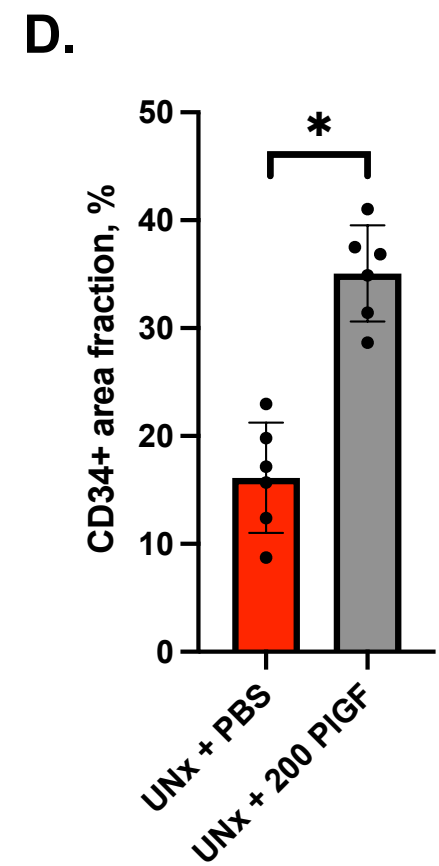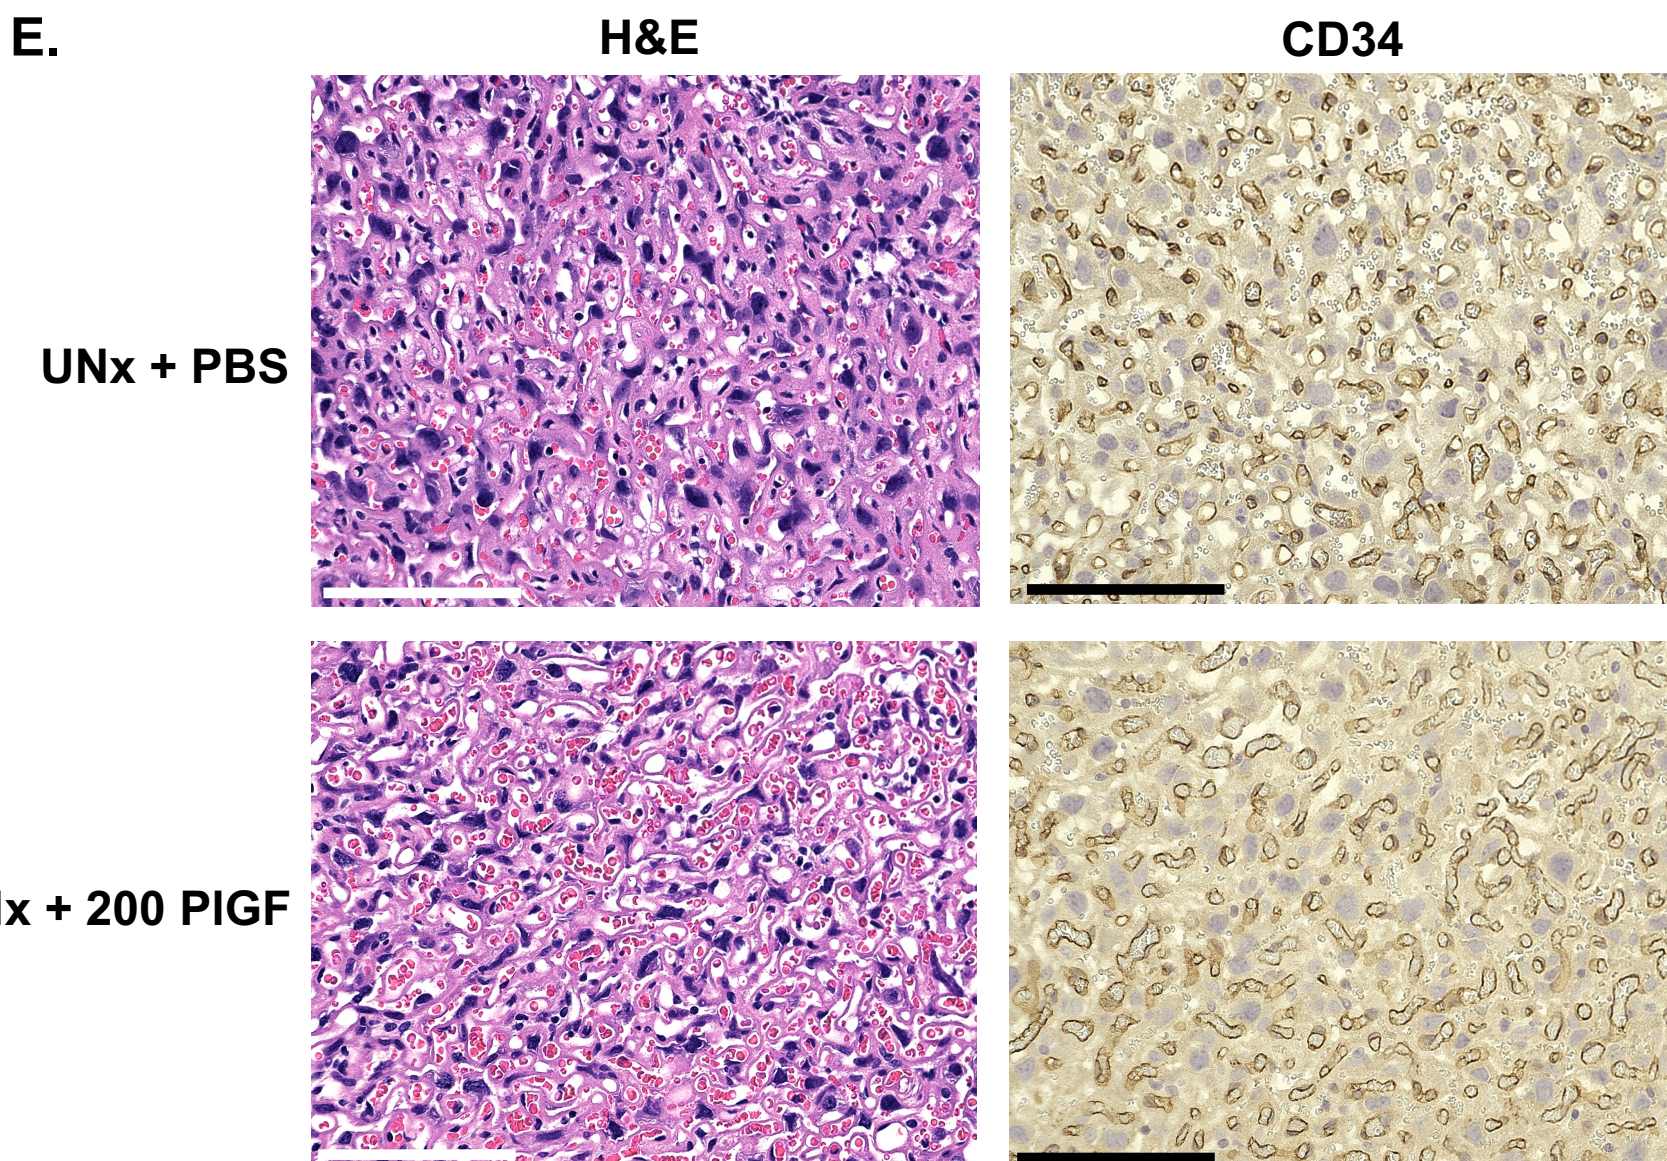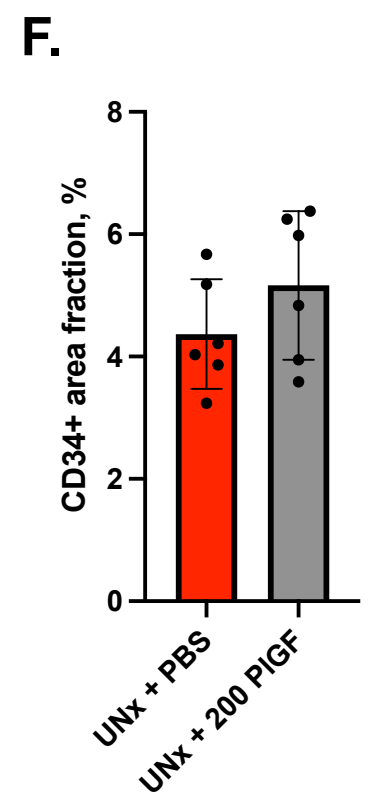



**Supplemental Figure 4. Trends in Metabolites Levels during Pregnancy in Sham and Uninephrectomized Mice from Metabolite platform**

Levels of O-phosphorylethanolamine **(A)**, L-homocysteine **(B)**, L-carnitine **(C)**, Myo-inositol **(D)**, Melibiose **(E)** and 5-Hydroxyindoleacetic acid **(F)** on the metabolite platform in non-pregnant (NP) state and at gestational day 18 (GD18) in Sham and uninephrectomized (UNx) mice. Results shown are normalized peak intensities (arbitrary unit) as individual values and as mean  $\pm$  standard deviations for each of the metabolites. n=4 per group. 1-way ANOVA with Tukey's test for multiple comparisons; \* $P < 0.05$ .

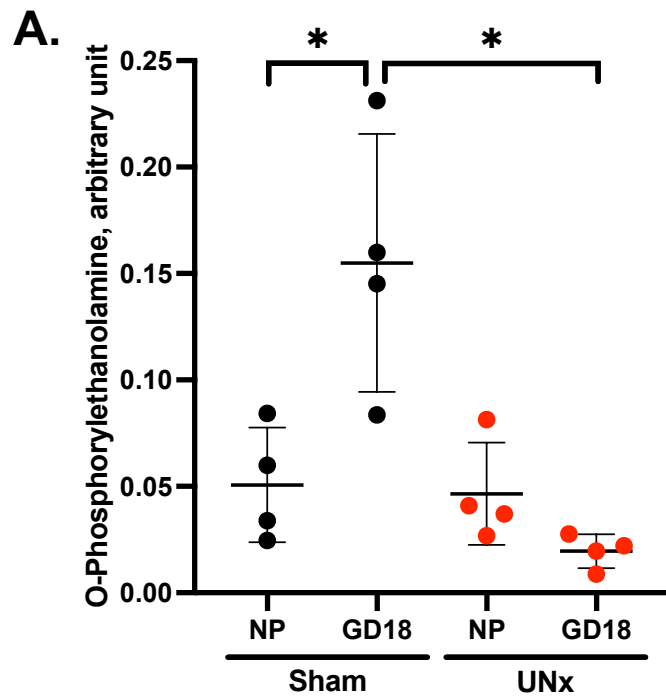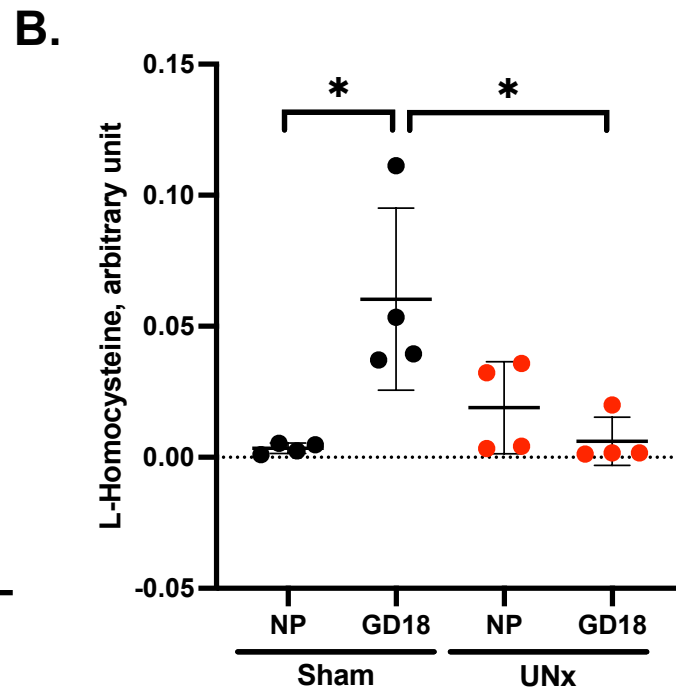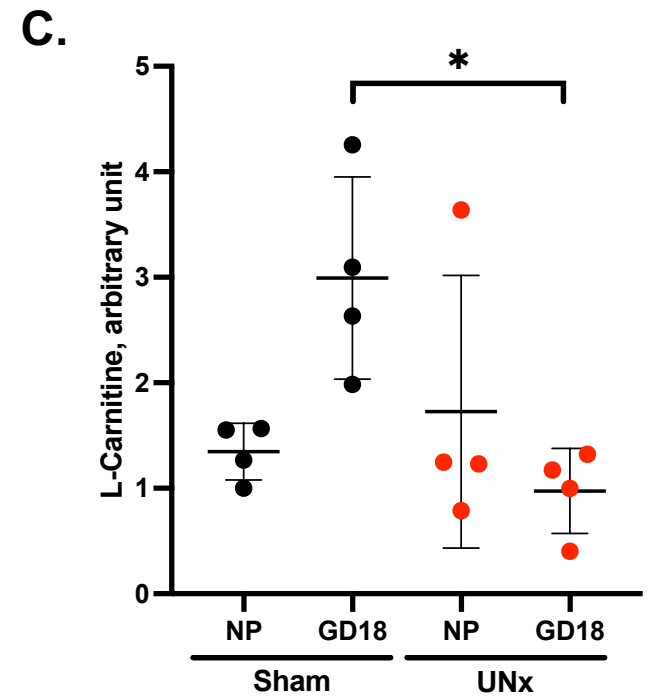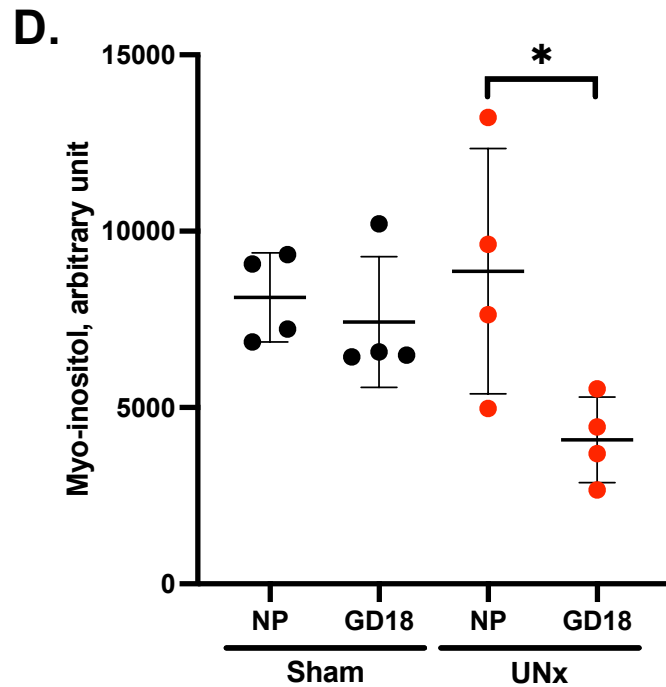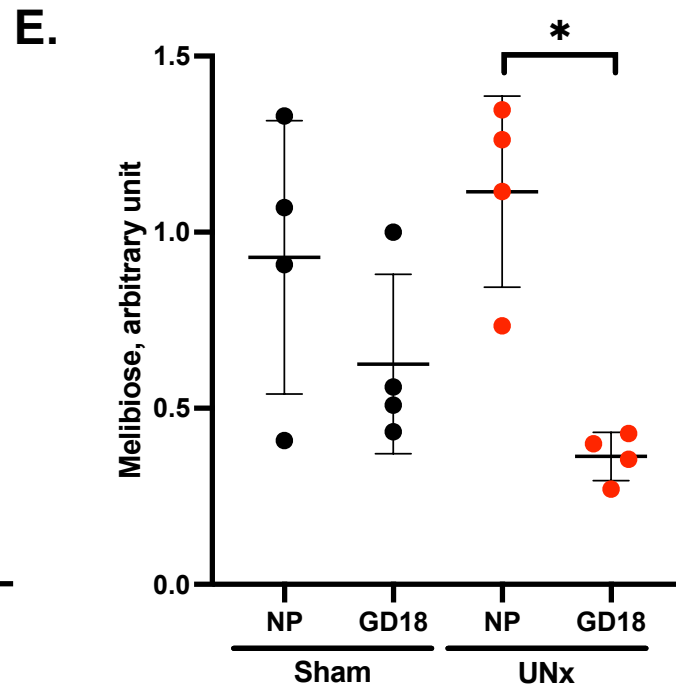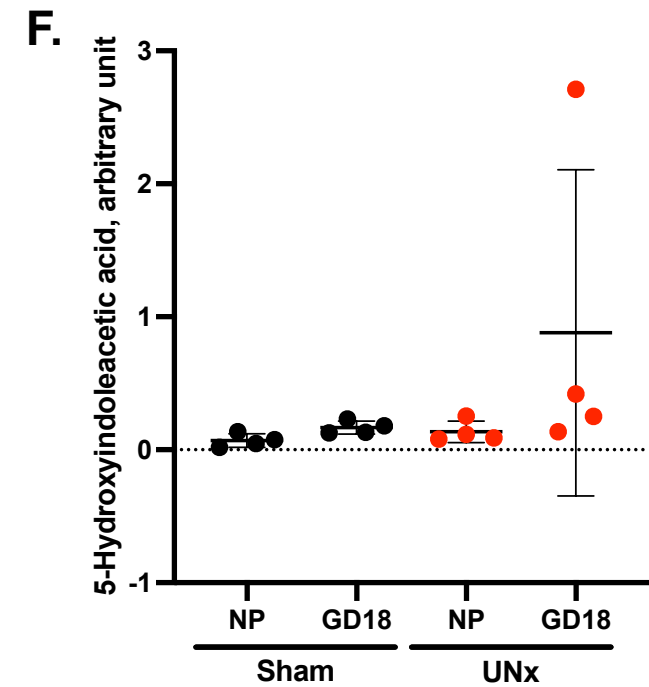

**Supplemental Figure 5. Phenotypes of Uninephrectomized mice treated with L-Kynurenine versus Uninephrectomized Mice during Pregnancy**

**(A)** Body weights of uninephrectomized (UNx) mice and UNx mice treated with L-kynurenine 25mg/L added to drinking water (UNx+Kyn) throughout pregnancy. **(B)** Gestational day 18 (GD18) left kidney weights in UNx and UNx+Kyn mice. Data were normalized with body weight values. **(C)** CD34 immunohistochemistry analysis of renal tissue at GD18 from one representative UNx (left panel) and one UNx+Kyn mice (right panel). L-kynurenine supplementation increased CD34 positive area among glomeruli in late pregnant UNx mice (scale bar= 125 $\mu$ m). **(D)** Summary data for the CD34 positive glomerular area quantified using ImageJ software in UNx and UNx+Kyn mice at GD18 is depicted. Data represent the mean  $\pm$  standard deviation. n=6 per group. Unpaired 2-tailed *t* test; \**P* < 0.05 in UNx+Kyn versus UNx mice.



**A.**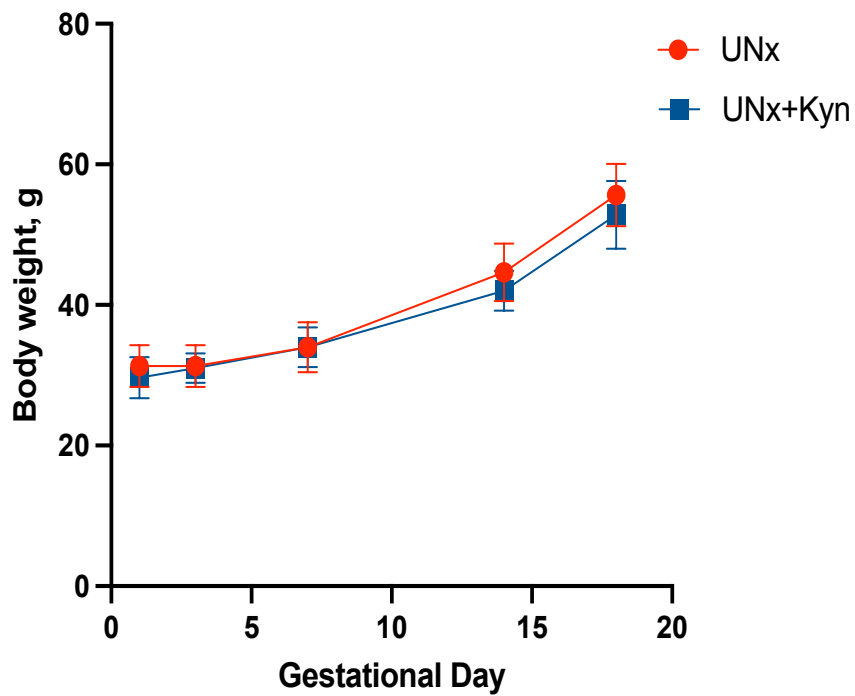**B.**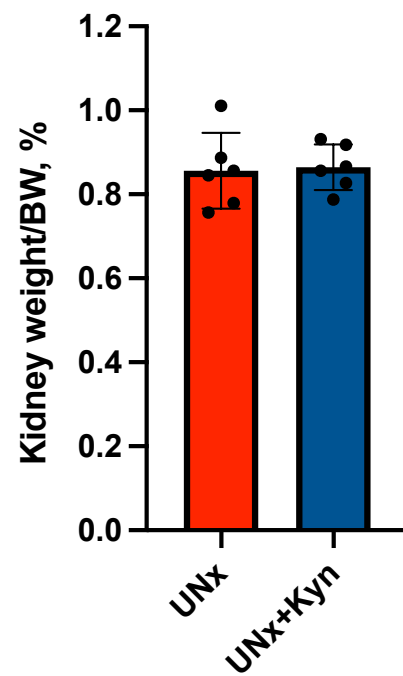**C.****UNx****UNx+Kyn**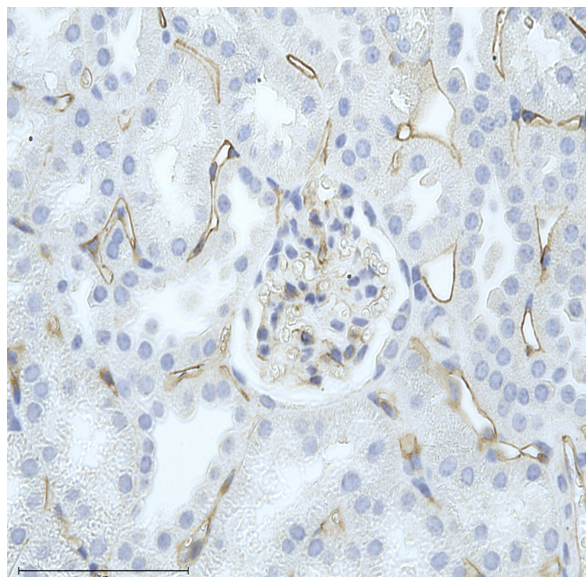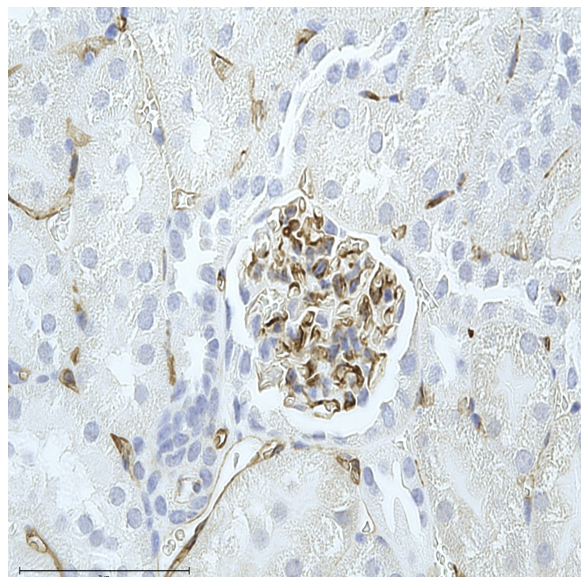**D.**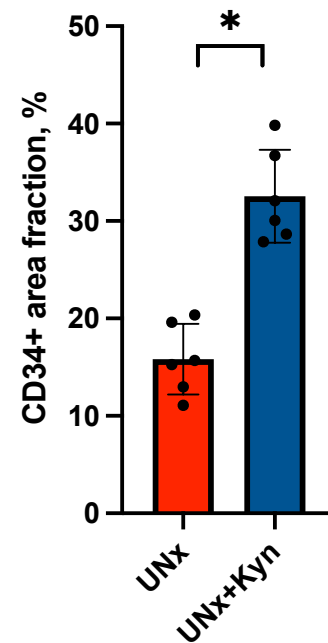

Supplement: jci-132-158346-s085.pdf [file jci-132-158346-s085.pdf]
